# Supplementary material for: Uncertainty quantification in the radiogenomics modeling of EGFR amplification in glioblastoma
Source: PubMed Central journal article supplement (PMC7886858; doi:10.1038/s41598-021-83141-z), 2021-02-16
Supplement: 41598_2021_83141_MOESM1_ESM.pdf [file 41598_2021_83141_MOESM1_ESM.pdf]

## Uncertainty Quantification in the Radiogenomics modeling of EGFR Amplification in Glioblastoma

Leland S. Hu\*<sup>#</sup>, MD<sup>1,2,3</sup>, Lujia Wang<sup>#</sup>, MS<sup>1,2,3</sup>, Andrea Hawkins-Daarud, PhD<sup>3</sup>, Jennifer M. Eschbacher, MD<sup>4</sup>, Kyle W. Singleton, PhD<sup>3</sup>, Pamela R. Jackson, PhD<sup>3</sup>, Kamala Clark-Swanson BS<sup>3</sup>, Christopher P. Sereduk<sup>9,11</sup>, Sen Peng<sup>12</sup>, Panwen Wang<sup>13</sup>, Junwen Wang<sup>13</sup>, Leslie C. Baxter, PhD<sup>5</sup>, Kris A. Smith, MD<sup>6</sup>, Gina L. Mazza, PhD<sup>7</sup>, Ashley M. Stokes, PhD<sup>8</sup>, Bernard R. Bendok, MD<sup>9</sup>, Richard S. Zimmerman, MD<sup>9</sup>, Chandan Krishna, MD<sup>9</sup>, Alyx B. Porter, MD<sup>10</sup>, Maciej M. Mrugala, MD<sup>10</sup>, PhD, Joseph M. Hoxworth, MD<sup>1</sup>, Teresa Wu, PhD<sup>1,2</sup>, Nhan L. Tran, PhD<sup>9,11</sup>, Kristin R. Swanson<sup>#</sup>, PhD<sup>3,9</sup>, Jing Li<sup>#</sup>, PhD<sup>1,2,3</sup>

\*Corresponding author

<sup>#</sup> contributed equally

### Affiliations:

1. Department of Radiology, Mayo Clinic Arizona, 5777 E. Mayo Blvd, Phoenix AZ, 85054
2. School of Computing, Informatics, and Decision Systems Engineering, Arizona State University, 699 S Mill Ave, Tempe, AZ, 85281, USA.
3. Mathematical NeuroOncology Lab, Precision Neurotherapeutics Innovation Program, Mayo Clinic Arizona, 5777 East Mayo Blvd, Support Services Building Suite 2-700, Phoenix, AZ, 85054.
4. Department of Pathology, Barrow Neurological Institute - St. Joseph's Hospital and Medical Center, Phoenix, AZ, 85013
5. Department of Neuropsychology, Mayo Clinic Arizona, 5777 E. Mayo Blvd, Phoenix AZ, 85054
6. Department of Neurosurgery, Barrow Neurological Institute - St. Joseph's Hospital and Medical Center, Phoenix, AZ, 85013
7. Department of Biostatistics, Mayo Clinic Arizona, 5777 E. Mayo Blvd, Phoenix AZ, 85054
8. Department of Imaging Research, Barrow Neurological Institute - St. Joseph's Hospital and Medical Center, Phoenix, AZ, 85013
9. Department of Neurosurgery, Mayo Clinic Arizona, 5777 E. Mayo Blvd, Phoenix AZ, 85054
10. Department of Neuro-Oncology, Mayo Clinic Arizona, 5777 E. Mayo Blvd, Phoenix AZ, 85054
11. Department of Cancer Biology, Mayo Clinic Arizona, 5777 E. Mayo Blvd, Phoenix AZ, 85054
12. Cancer and Cell Biology Division, Translational Genomics Research Institute, Phoenix, AZ 85004
13. Department of Health Sciences Research, Center for Individualized Medicine, Mayo Clinic, Scottsdale, AZ 85259

Funding: NS082609, CA221938, CA220378, NSF-1149602, Mayo Clinic Foundation, James S. McDonnell Foundation, Ivy Foundation, Arizona Biomedical Research Commission

### Correspondence:

Leland S. Hu, M.D.  
Department of Radiology  
Mayo Clinic, Arizona  
Hu.Leland@Mayo.Edu  
Phone: (480) 301-7470  
Fax: (480) 301-4303

**Key words:** Uncertainty, Radiogenomics, Glioblastoma, Glioma, Intratumoral, Heterogeneity

**Author contributions:**

LSH contributed to conception, design of the work, acquisition, analysis, and interpretation of data

LW contributed to conception, design of the work, acquisition, analysis, and interpretation of data

AHD contributed to analysis and interpretation of data

JME contributed to acquisition and analysis of data

KS contributed to acquisition and analysis of data

PRJ contributed to acquisition and analysis of data

KCS contributed to acquisition and analysis of data

CPS contributed to acquisition and analysis of data

SP contributed to acquisition and analysis of data

PW contributed to acquisition and analysis of data

JW contributed to acquisition and analysis of data

LCB contributed to design of the work and acquisition of data

KAS contributed to design of the work and acquisition of data

GM contributed to acquisition and analysis of data

AS contributed to acquisition and analysis of data

BRB contributed to analysis and interpretation of data

RSZ contributed to analysis and interpretation of data

CK contributed to analysis and interpretation of data

ABP contributed to analysis and interpretation of data

MMM contributed to analysis and interpretation of data

JMH contributed to analysis and interpretation of data

TW contributed to analysis and interpretation of data

NLT contributed to design of the work, acquisition, analysis, and interpretation of data

KRS contributed to conception, design of the work, acquisition, analysis, and interpretation of data

JL contributed to conception, design of the work, acquisition, analysis, and interpretation of data

**Supplemental Table S1: Patient demographics for the 25 untreated high-grade glioma tumors in the training set.** Patients labeled A through Y. M=male, F=female. Patient L on histology was diagnosed as Grade III Anaplastic Astrocytoma, although molecular features were consistent with Glioblastoma (e.g., EGFR amplification). NA = not available. Wt = wild type. aCGH = array comparative genomic hybridization; WES = whole exome sequencing

| Patient | Type                   | Pathology | IDH.status | Sequenced |
|---------|------------------------|-----------|------------|-----------|
| A       | Glioblastoma           | primary   | NA         | aCGH      |
| B       | Glioblastoma           | primary   | NA         | aCGH      |
| C       | Glioblastoma           | primary   | NA         | aCGH      |
| D       | Glioblastoma           | primary   | NA         | aCGH      |
| E       | Glioblastoma           | primary   | NA         | aCGH      |
| F       | Glioblastoma           | primary   | NA         | aCGH      |
| G       | Glioblastoma           | primary   | NA         | aCGH      |
| H       | Glioblastoma           | primary   | NA         | aCGH      |
| I       | Glioblastoma           | primary   | NA         | aCGH      |
| J       | Glioblastoma           | primary   | NA         | aCGH      |
| K       | Glioblastoma           | primary   | NA         | aCGH      |
| L       | Anaplastic Astrocytoma | primary   | NA         | aCGH      |
| M       | Glioblastoma           | primary   | NA         | aCGH      |
| N       | Glioblastoma           | primary   | wt         | WES       |

|   |              |         |             |      |
|---|--------------|---------|-------------|------|
| O | Glioblastoma | primary | wt          | WES  |
| P | Glioblastoma | primary | wt          | WES  |
| Q | Glioblastoma | primary | V178I/G105G | WES  |
| R | Glioblastoma | primary | wt          | WES  |
| S | Glioblastoma | primary | R132H       | WES  |
| T | Glioblastoma | primary | wt          | WES  |
| U | Glioblastoma | primary | NA          | aCGH |
| V | Glioblastoma | primary | wt          | WES  |
| W | Glioblastoma | primary | wt          | WES  |
| X | Glioblastoma | primary | V178I       | WES  |
| Y | Glioblastoma | primary | wt          | WES  |

**Supplemental Table S2: Patient demographics for the 7 untreated high-grade glioma tumors in the validation set.** Patients labeled AA through GG. M=male, F=female. NA = not available. Wt = wild type. aCGH = array comparative genomic hybridization; WES = whole exome sequencing

| Patient | Type                   | Pathology | IDH.status | Sequenced |
|---------|------------------------|-----------|------------|-----------|
| AA      | Anaplastic Astrocytoma | primary   | WT         | WES       |
| AB      | Anaplastic Astrocytoma | primary   | WT         | WES       |
| AC      | Glioblastoma           | primary   | WT         | WES       |
| AD      | Anaplastic Astrocytoma | primary   | WT         | WES       |
| AE      | Glioblastoma           | primary   | WT         | WES       |
| AF      | Glioblastoma           | primary   | WT         | WES       |
| AG      | Anaplastic Astrocytoma | primary   | WT         | WES       |
